# Supplementary material for: New Unsymmetrically Substituted Benzothiadiazole-Based Luminophores: Synthesis, Optical, Electrochemical Studies, Charge Transport, and Electroluminescent Characteristics
Source: Molecules. 2021 Dec 15;26(24):7596. doi: 10.3390/molecules26247596 (PMC8705470; doi:10.3390/molecules26247596)
Supplement: Supplementary file 1 [file molecules-26-07596-s001.zip › molecules-1508480-supplementary.pdf]

## Supporting information *for*

### **Novel unsymmetrically substituted benzothiadiazole-based luminophores: synthesis, optical, electrochemical studies, charge transport and electroluminescent characteristics.**

Pavel S.Gribanov, Dmitry A. Loginov, Dmitry A.Lypenko, Artem V.Dmitriev, Sergey I.Pozin,  
Alexey E. Aleksandrov, Alexey R. Tameev, Igor L. Martynov, Andrey Yu. Chernyadyev,  
Sergey N.Osipov

#### **Table of contents**

|                                    |   |
|------------------------------------|---|
| Voltammetry studies.....           | 1 |
| Charge mobility measurements ..... | 3 |
| References .....                   | 5 |
| DFT calculations .....             | 6 |
| NMR spectra.....                   | 8 |

#### **Voltammetry studies**

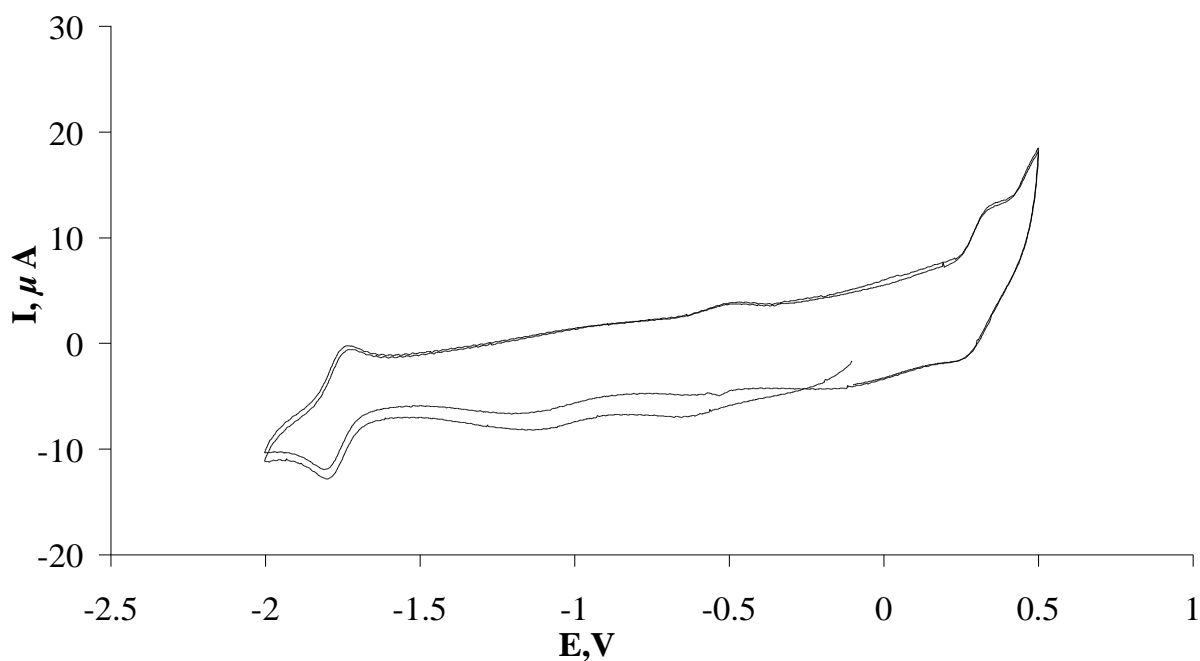

**Figure S1.** Cyclic voltammogram of **D1**.

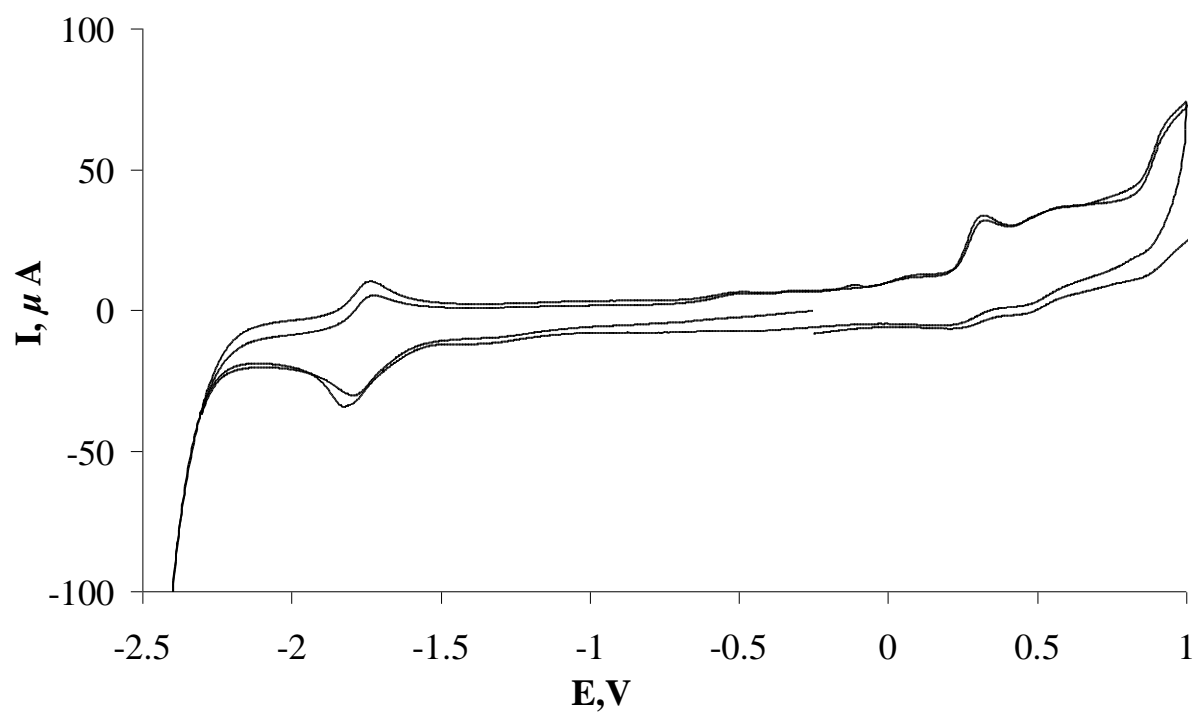

**Figure S2.** Cyclic voltammogram of **D2**.

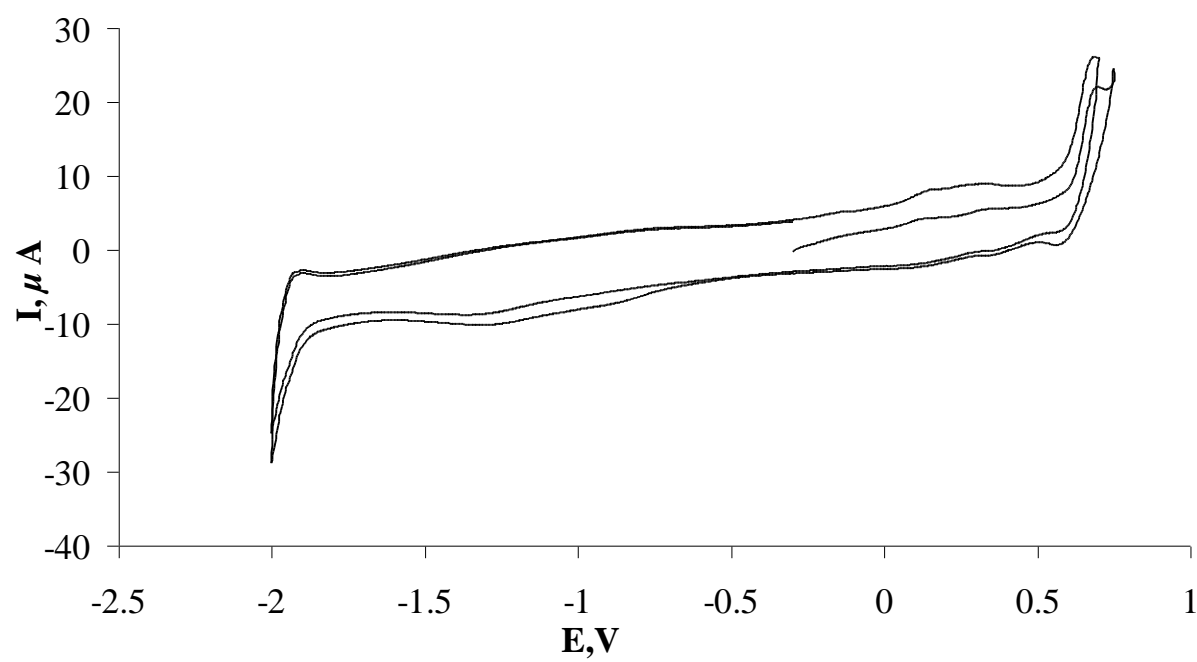

**Figure S3.** Cyclic voltammogram of **D3**.

## Charge mobility measurements

In thin layers of the composites, charge carrier mobility ( $\mu$ ) was measured by using the technique of charge extraction by linearly increasing voltage (CELIV) with metal-insulator-semiconductor (MIS) diode structures. A thin layer of the mCP/PSG (10 wt.%) composite of the thickness  $d_s$  ranged between 100 nm and 130 nm was deposited onto the SiO<sub>2</sub>/ITO/glass substrate by co-deposition in vacuum chamber. Then a 80 nm thick Al top electrode was deposited onto the composite layer by thermal evaporation of the material under 10<sup>-6</sup> mbar vacuum at rate of 1 Å/s. A charge carrier blocking SiO<sub>2</sub> layer of the thickness  $d_i = 70$  nm was preliminary deposited onto ITO-coated glass by magnetron scattering at 10<sup>-3</sup> mbar.

The CELIV set-up included a digital USB-oscilloscope (DL-Analog Discovery, Digilent Co.), which played roles of master pulse generator and transient current pulse monitor.  $RC$  constants were at least a factor of 20 smaller than the time scales of interest. The bias was swept in the range between 10 and 100 kHz.

A small charge extraction regime of the MIS-CELIV experiment was used. The condition  $\Delta j \leq j(0)$  where  $\Delta j$  is a maximum current of the unipolar charge carriers and  $j(0)$  is a capacitance current [1]. The corresponding small-charge transit time  $t_{max}$  for the sheet of carriers to reach the extracting contact defines the mobility as following [1]:

$$\mu = \frac{2d_s^2}{At_{max}^2(1+f)}$$

where the ratio between the geometric capacitances of the organic semiconductor and the SiO<sub>2</sub> insulator layers  $f \equiv (\epsilon_s d_i)/(\epsilon_i d_s)$  is ranged between ~0.34 and ~0.45 for dielectric constant is  $\epsilon_i = 3.9$  and  $\epsilon_s \approx 2.5$  for SiO<sub>2</sub> and mCP/PSG (10 wt.%) composite, respectively.

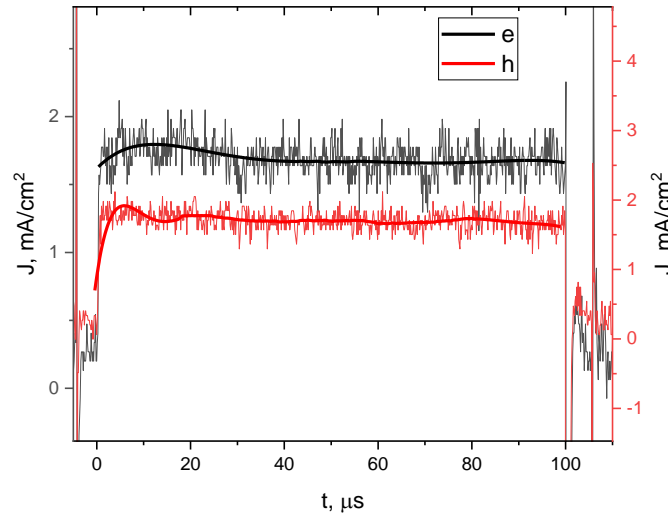

**Figure S4.** MIS-CELIV transient current of holes and electrons in mCP

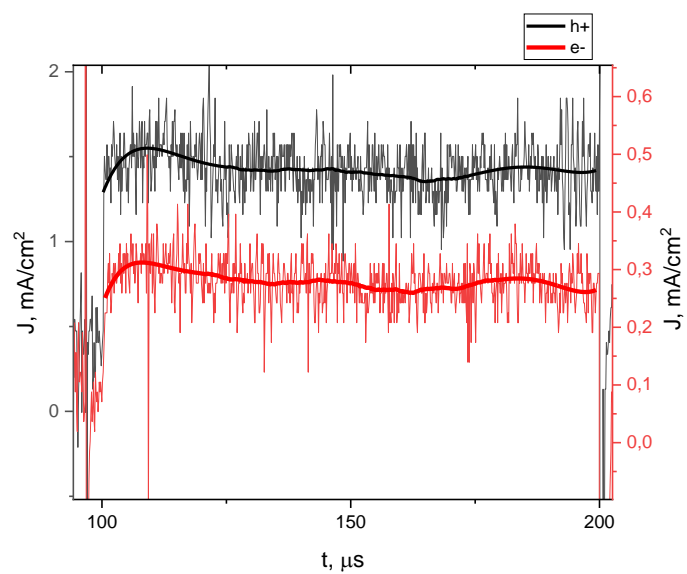

**Figure S5.** MIS-CELIV transient current of holes and electrons in **D1/mCP** composite

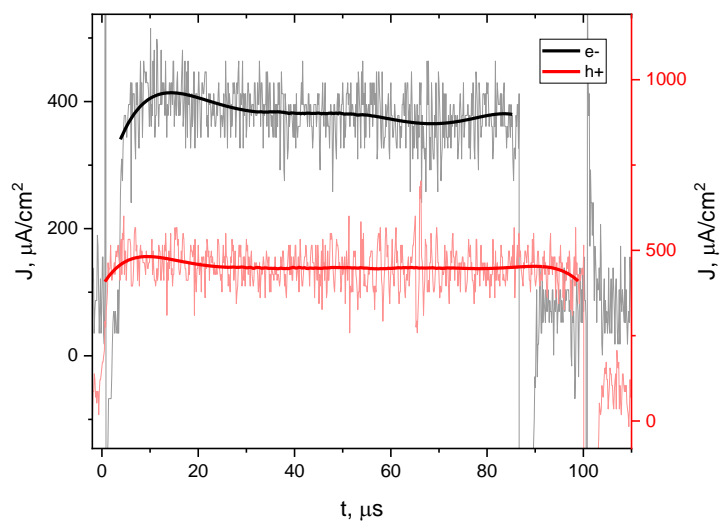

**Figure S6 .** MIS-CELIV transient current of holes and electrons in **D2/mCP** composite

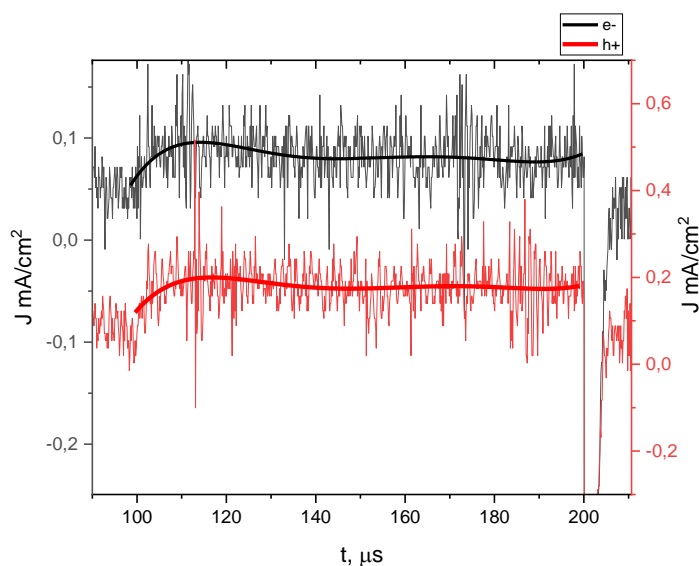

**Figure S7.** MIS-CELIV transient current of holes and electrons in **D3**/mCP composite

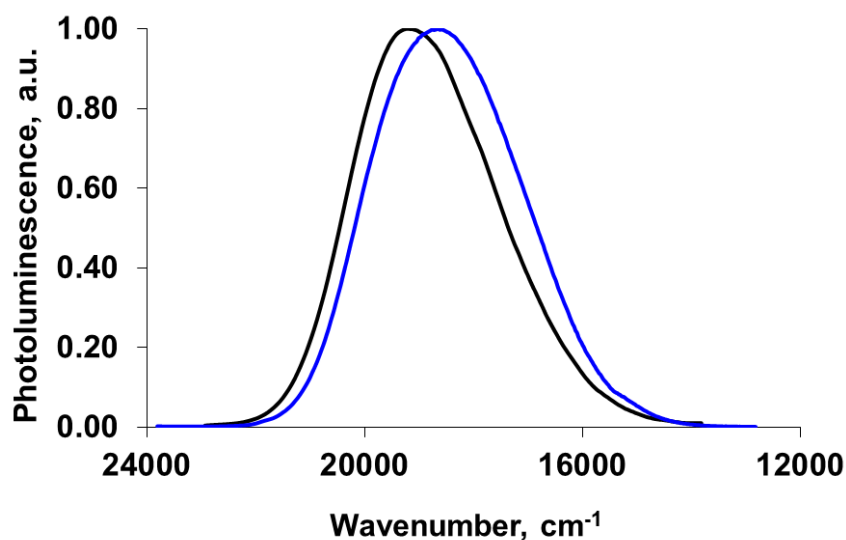

**Figure S8.** Solvatochromism for **D3**. Black – PL in *m*-xylene, blue – PL in chlorobenzene. Concentration  $10^{-5}$  M,  $\lambda_{\text{ex}} = 375\text{-}400$  nm.

## References

- [1] Sandberg, O.J.; Nyman, M.; Dahlstrom, S.; Sanden, S.; Torngren, B.; Smatt, J.-H.; Osterbacka, R. On the validity of MIS-CELIV for mobility determination in organic thin-film devices. *Appl. Phys. Lett.* **2017**, *110*, 153504.

## DFT calculations

**Table S1.** Selected molecular orbitals of **D1-3** at the B3LYP/6-31G(d) level (isovalue = 0.02 a.u.). Energies of the orbitals are given in parentheses in eV.

| Compound | HOMO-1                                                                                       | HOMO                                                                                          | LUMO                                                                                           |
|----------|----------------------------------------------------------------------------------------------|-----------------------------------------------------------------------------------------------|------------------------------------------------------------------------------------------------|
| D1       | 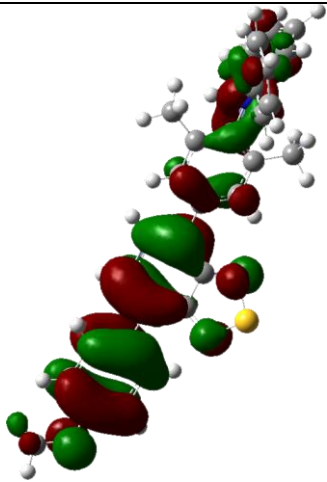<br>-5.58   | 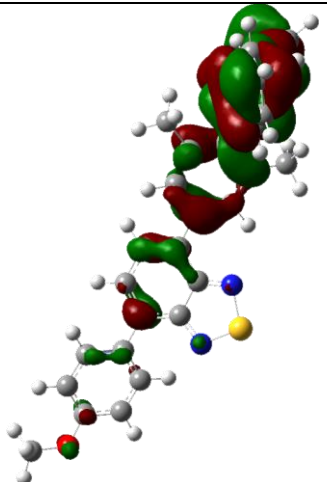<br>-5.05   | 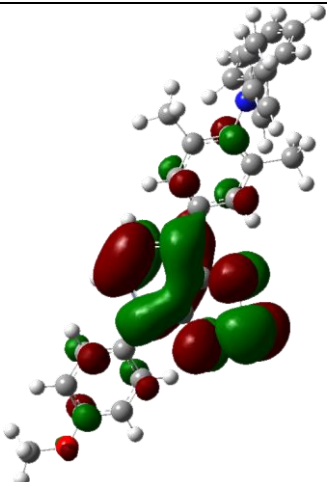<br>-2.36   |
| D2       | 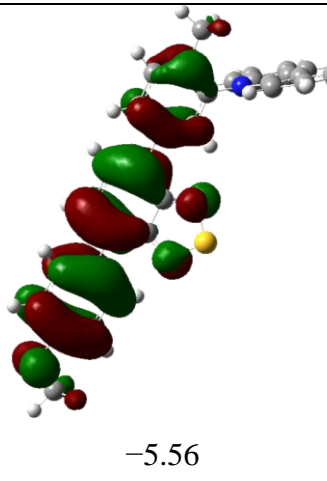<br>-5.56  | 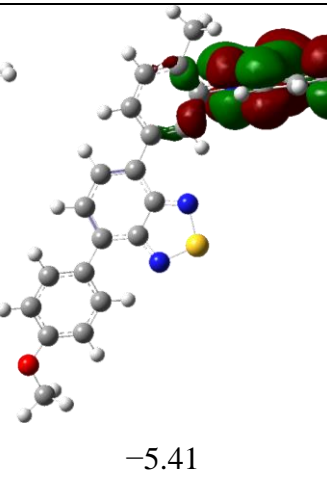<br>-5.41  | 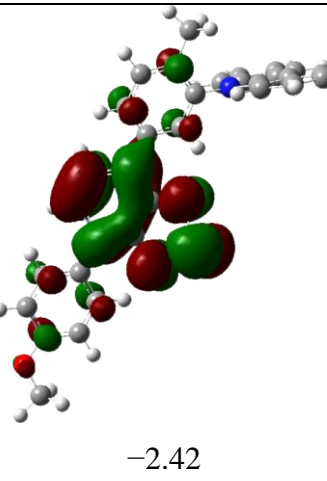<br>-2.42  |
| D3       | 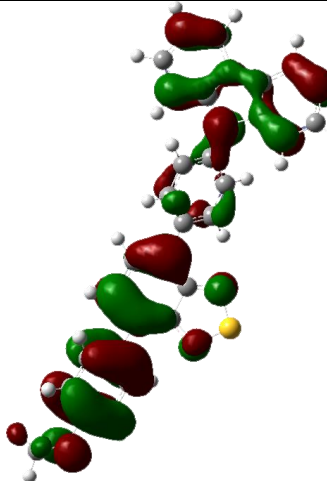<br>-5.69 | 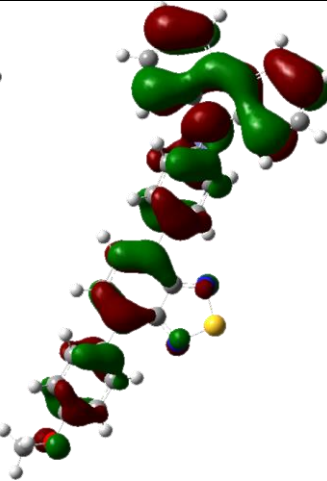<br>-5.33 | 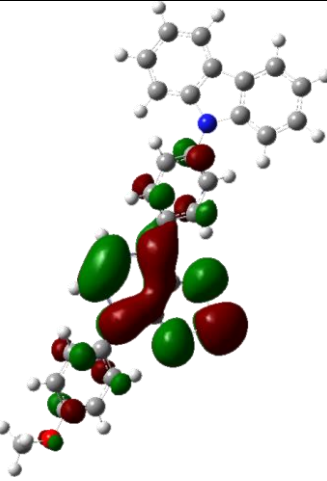<br>-2.44 |

**Table S2.** Geometry of the ground state and energy parameters of excited states of **D1-3** as predicted from DFT (at the B3LYP/6-31G(d) level using the PCM solvation model with xylene-mixture as a solvent).

| Compound  | $\theta_1$ , <sup>[a]</sup> ° | $\theta_2$ , <sup>[b]</sup> ° | $\theta_3$ , <sup>[c]</sup> ° | $E(S_1)$ , <sup>[d]</sup> eV | $E(T_1)$ , <sup>[d]</sup> eV | $E(T_2)$ , <sup>[d]</sup> eV |
|-----------|-------------------------------|-------------------------------|-------------------------------|------------------------------|------------------------------|------------------------------|
| <b>D1</b> | -                             | 36.9                          | 36.5                          | 2.289                        | 1.765                        | 2.377                        |
| <b>D2</b> | 78.5                          | 36.1                          | 35.0                          | 2.583                        | 1.800                        | 2.581                        |
| <b>D3</b> | 54.3                          | 36.8                          | 36.1                          | 2.478                        | 1.783                        | 2.604                        |

<sup>[a]</sup>  $\theta_1$  is the dihedral angle between carbazole and aryl linker. <sup>[b]</sup>  $\theta_2$  is the dihedral angle between aryl linker and benzothiadiazole. <sup>[c]</sup>  $\theta_3$  is the dihedral angle between benzothiadiazole and 4-MeO-phenyl substituent. <sup>[d]</sup>  $E(S_1)$  is the energy of the first excited singlet state.  $E(T_1)$  and  $E(T_2)$  are the energy levels of the first and second excited triplet states.

**Table S3.** General analysis of the absorption bands of **D1-3** by TD DFT calculations at the CAM-B3LYP/6-31G(d) level.

| Compound  | Experimental absorption maxima (nm) | Calculated absorption maxima (nm) | Calculated oscillator strengths | Main MOs responsible for excitation <sup>[a]</sup>               |
|-----------|-------------------------------------|-----------------------------------|---------------------------------|------------------------------------------------------------------|
| <b>D1</b> | 420                                 | 395                               | 0.6218                          | HOMO → LUMO (43%),<br>HOMO-1 → LUMO (52%),<br>HOMO-2 → LUMO (2%) |
| <b>D2</b> | 404                                 | 389                               | 0.5594                          | HOMO-1 → LUMO (93%)                                              |
| <b>D3</b> | 412                                 | 392                               | 0.6548                          | HOMO → LUMO (55%),<br>HOMO-1 → LUMO (39%),<br>HOMO-3 → LUMO (3%) |

<sup>[a]</sup> Values in parentheses give the percentage contribution of the corresponding orbitals to the total transition.

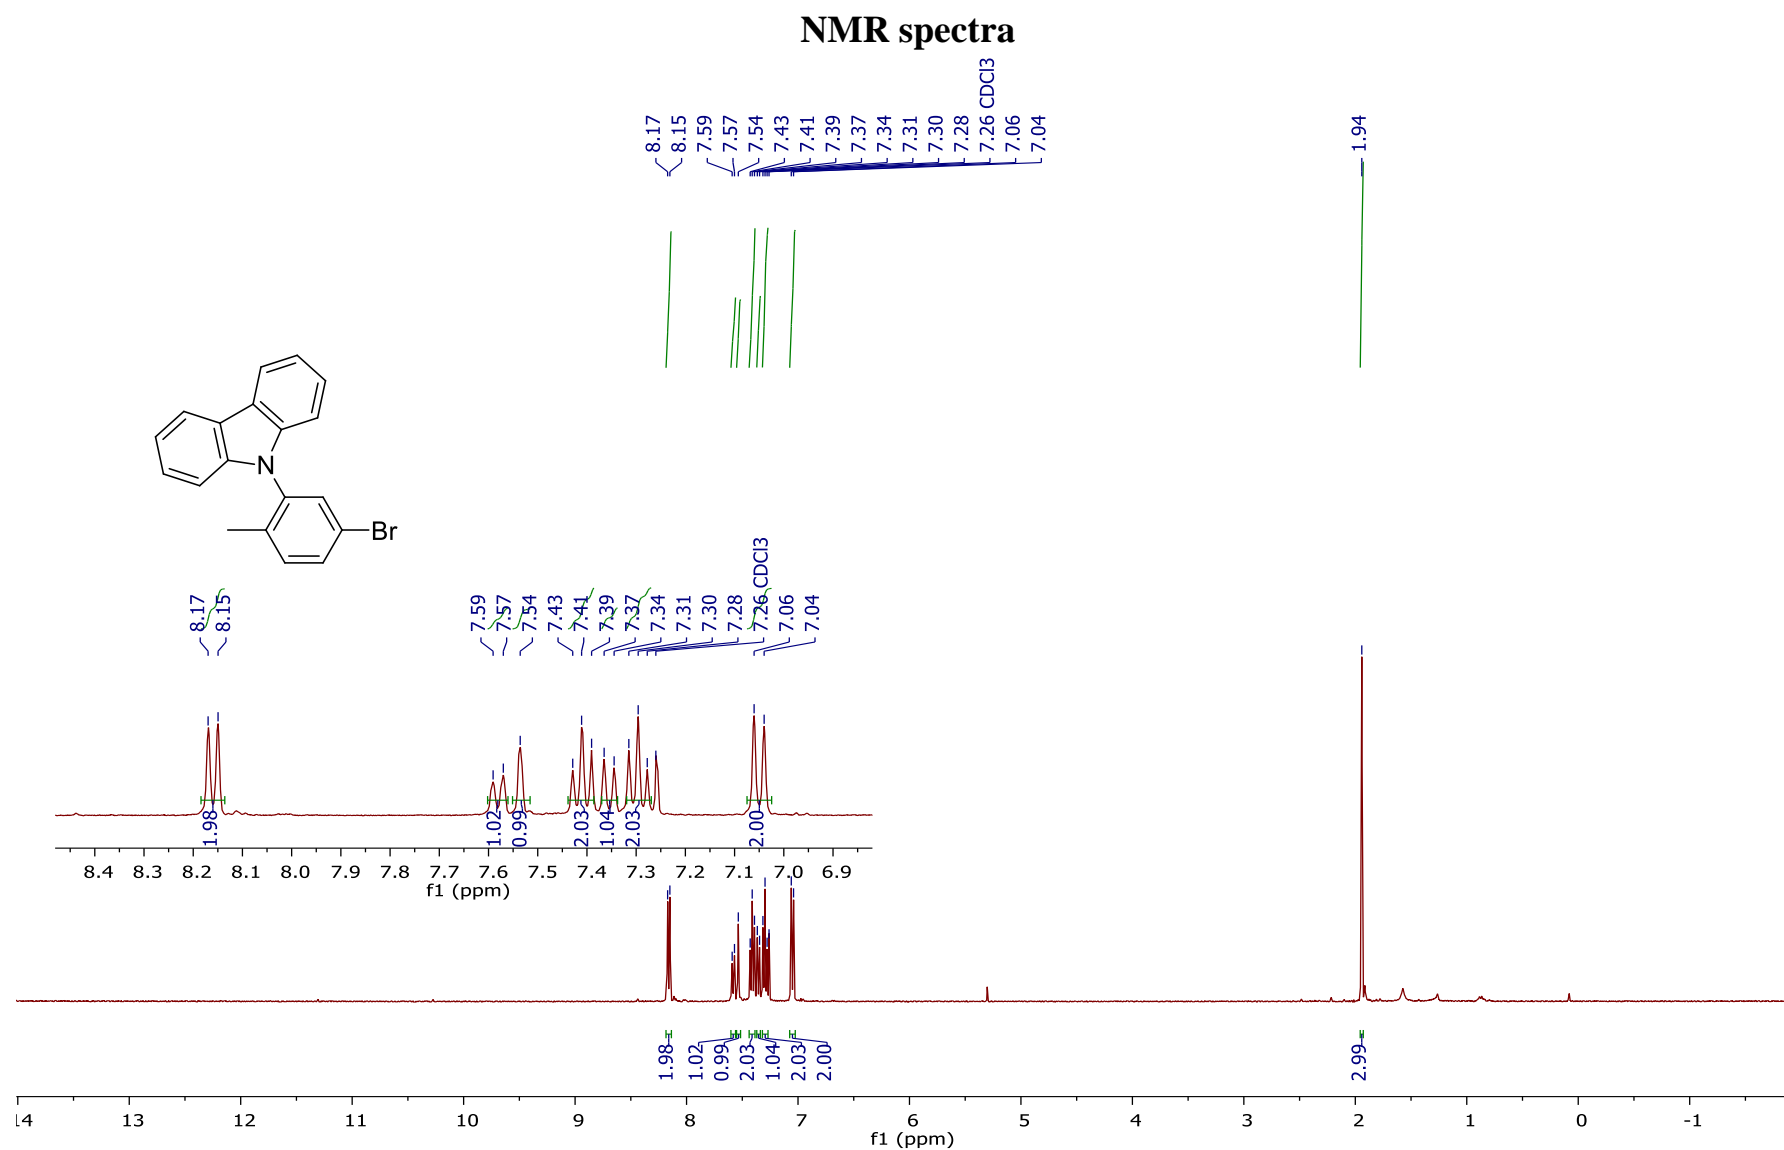

**Figure S9.** <sup>1</sup>H (400 MHz, Chloroform-*d*) of NMR 9-(5-bromo-2-methylphenyl)-9*H*-carbazole (3)

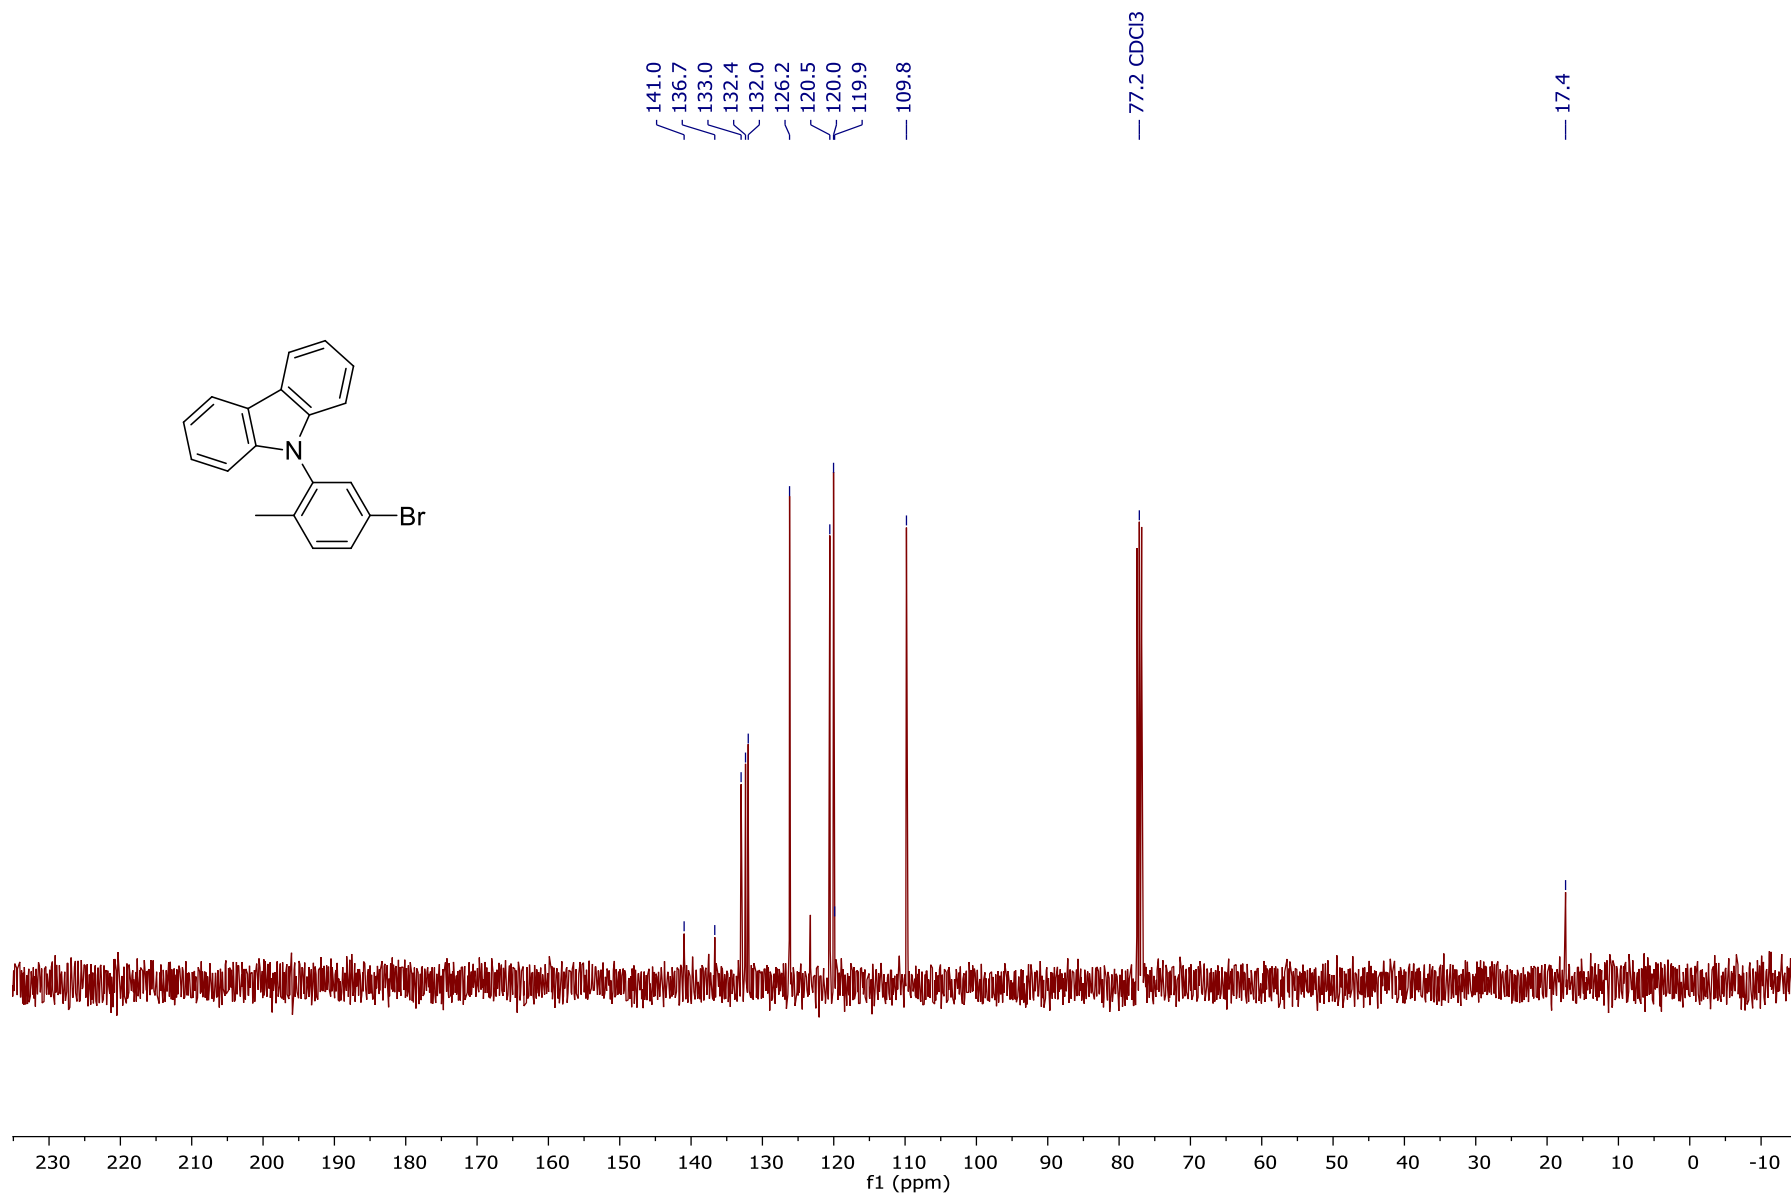

Figure S10.  $^{13}\text{C}\{^1\text{H}\}$  NMR (101 MHz, Chloroform-*d*) of 9-(5-bromo-2-methylphenyl)-9H-carbazole (3)

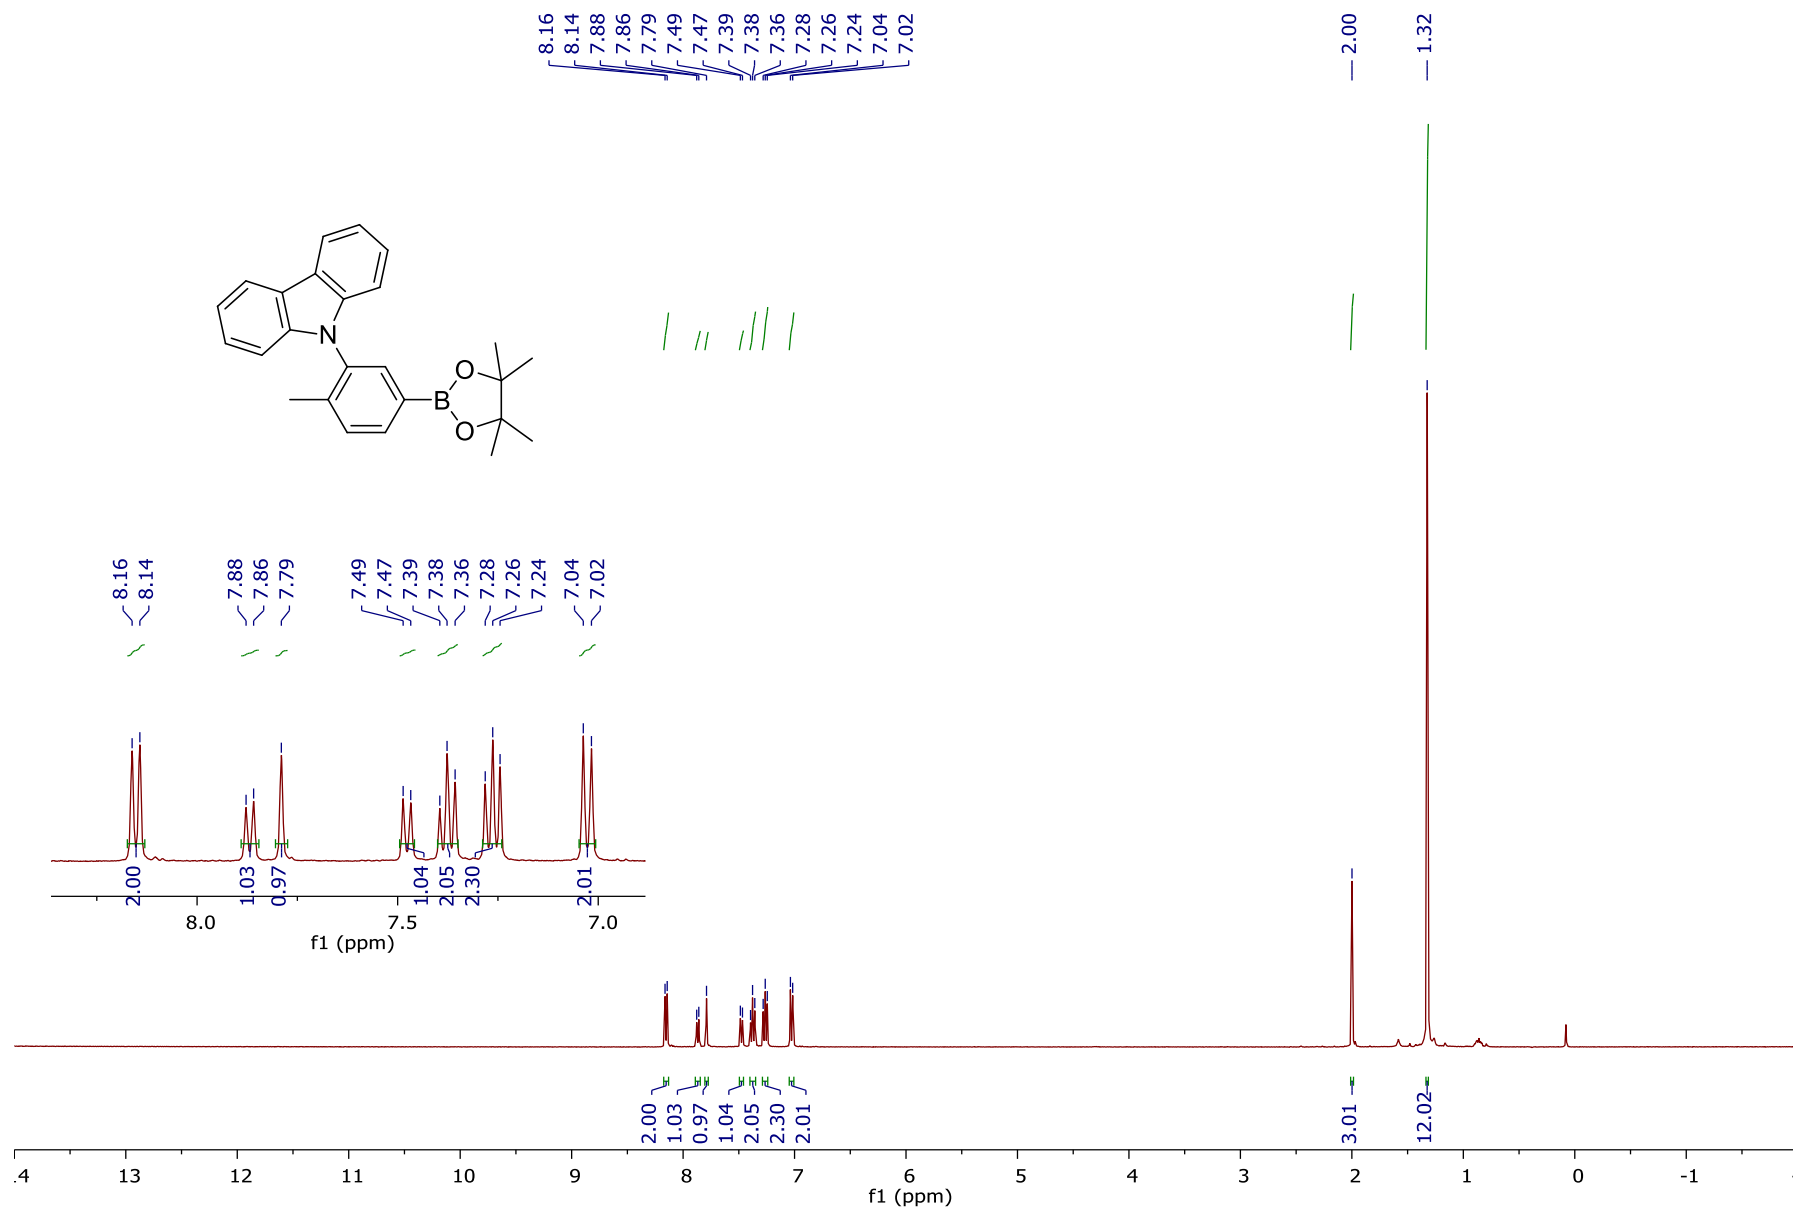

Figure S11. <sup>1</sup>H (400 MHz, Chloroform-d) of 9-(2-methyl-5-(4,4,5,5-tetramethyl-1,3,2-dioxaborolan-2-yl)phenyl)-9H-carbazole (4)

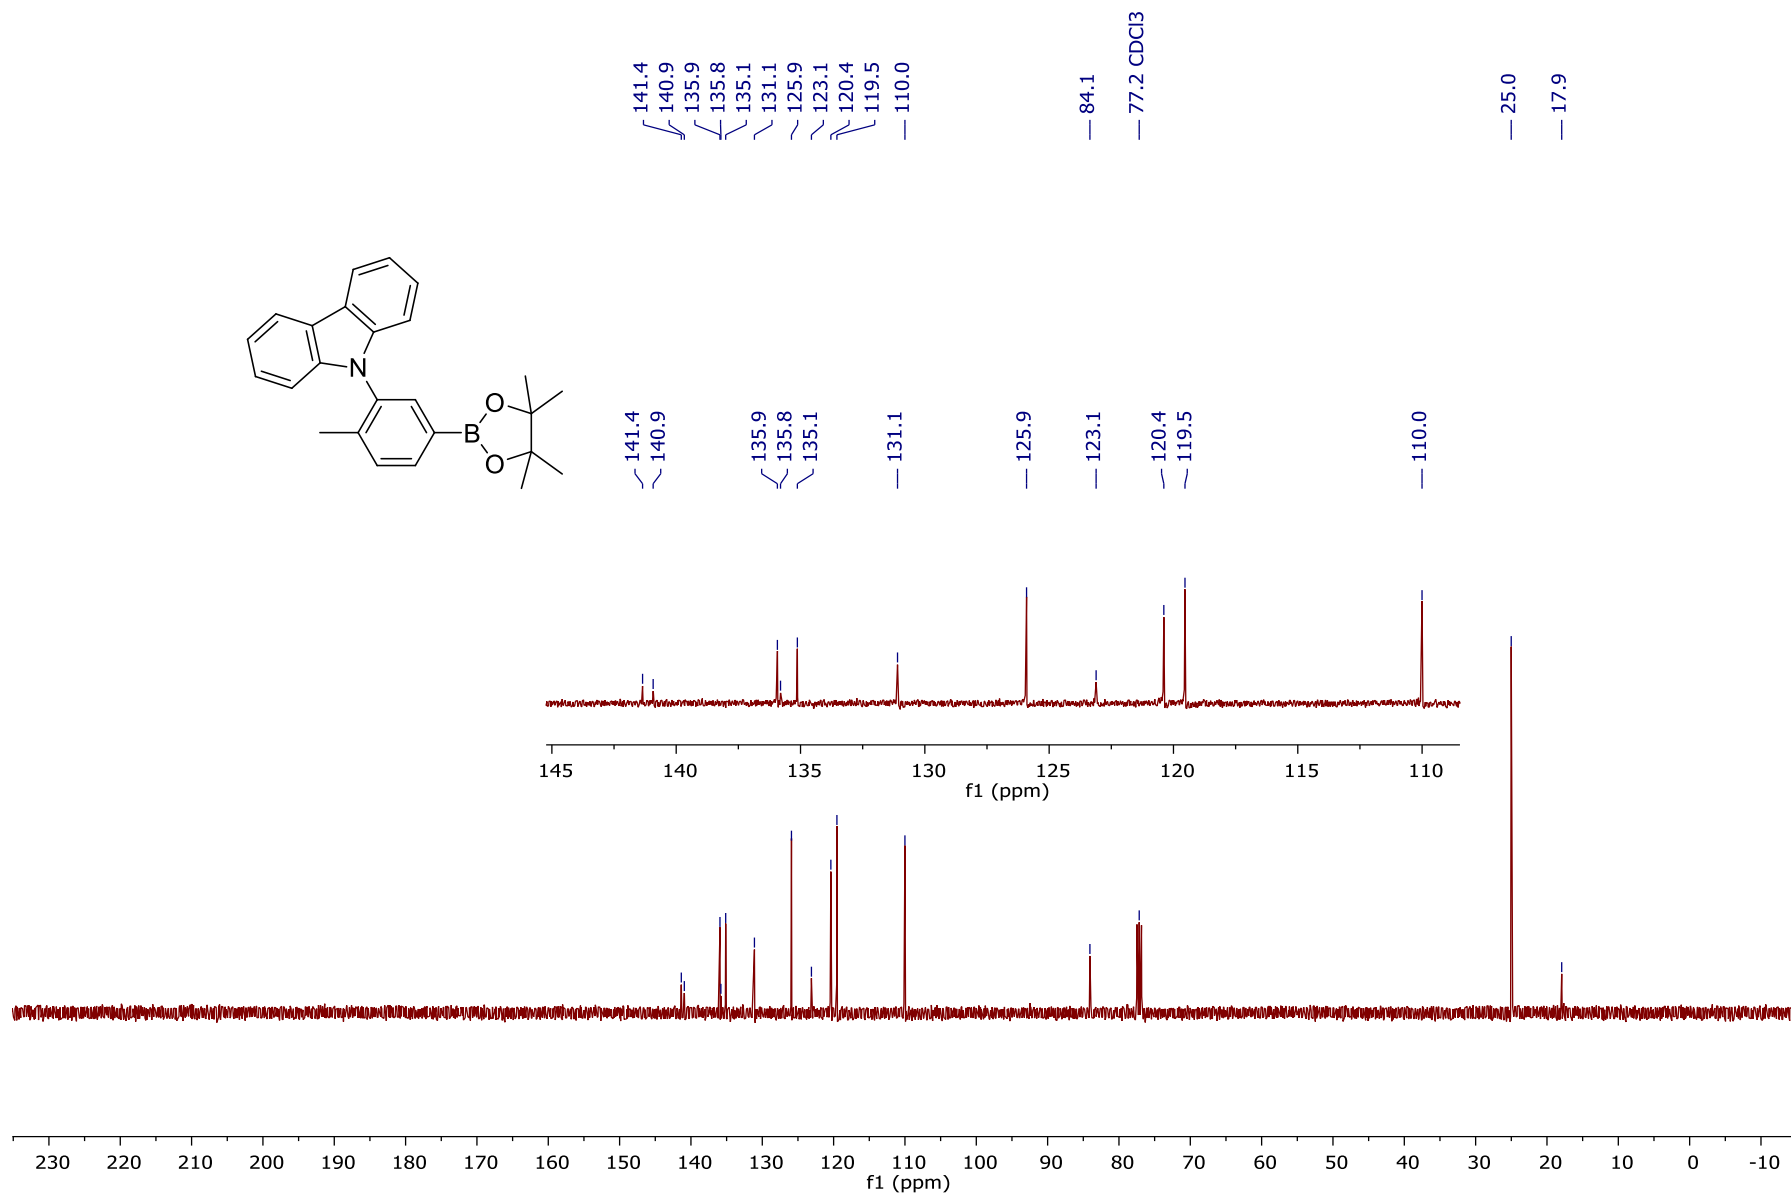

Figure S12.  $^{13}\text{C}\{^1\text{H}\}$  NMR (101 MHz,  $\text{CDCl}_3$ ) of 9-(2-methyl-5-(4,4,5,5-tetramethyl-1,3,2-dioxaborolan-2-yl)phenyl)-9H-carbazole (4)

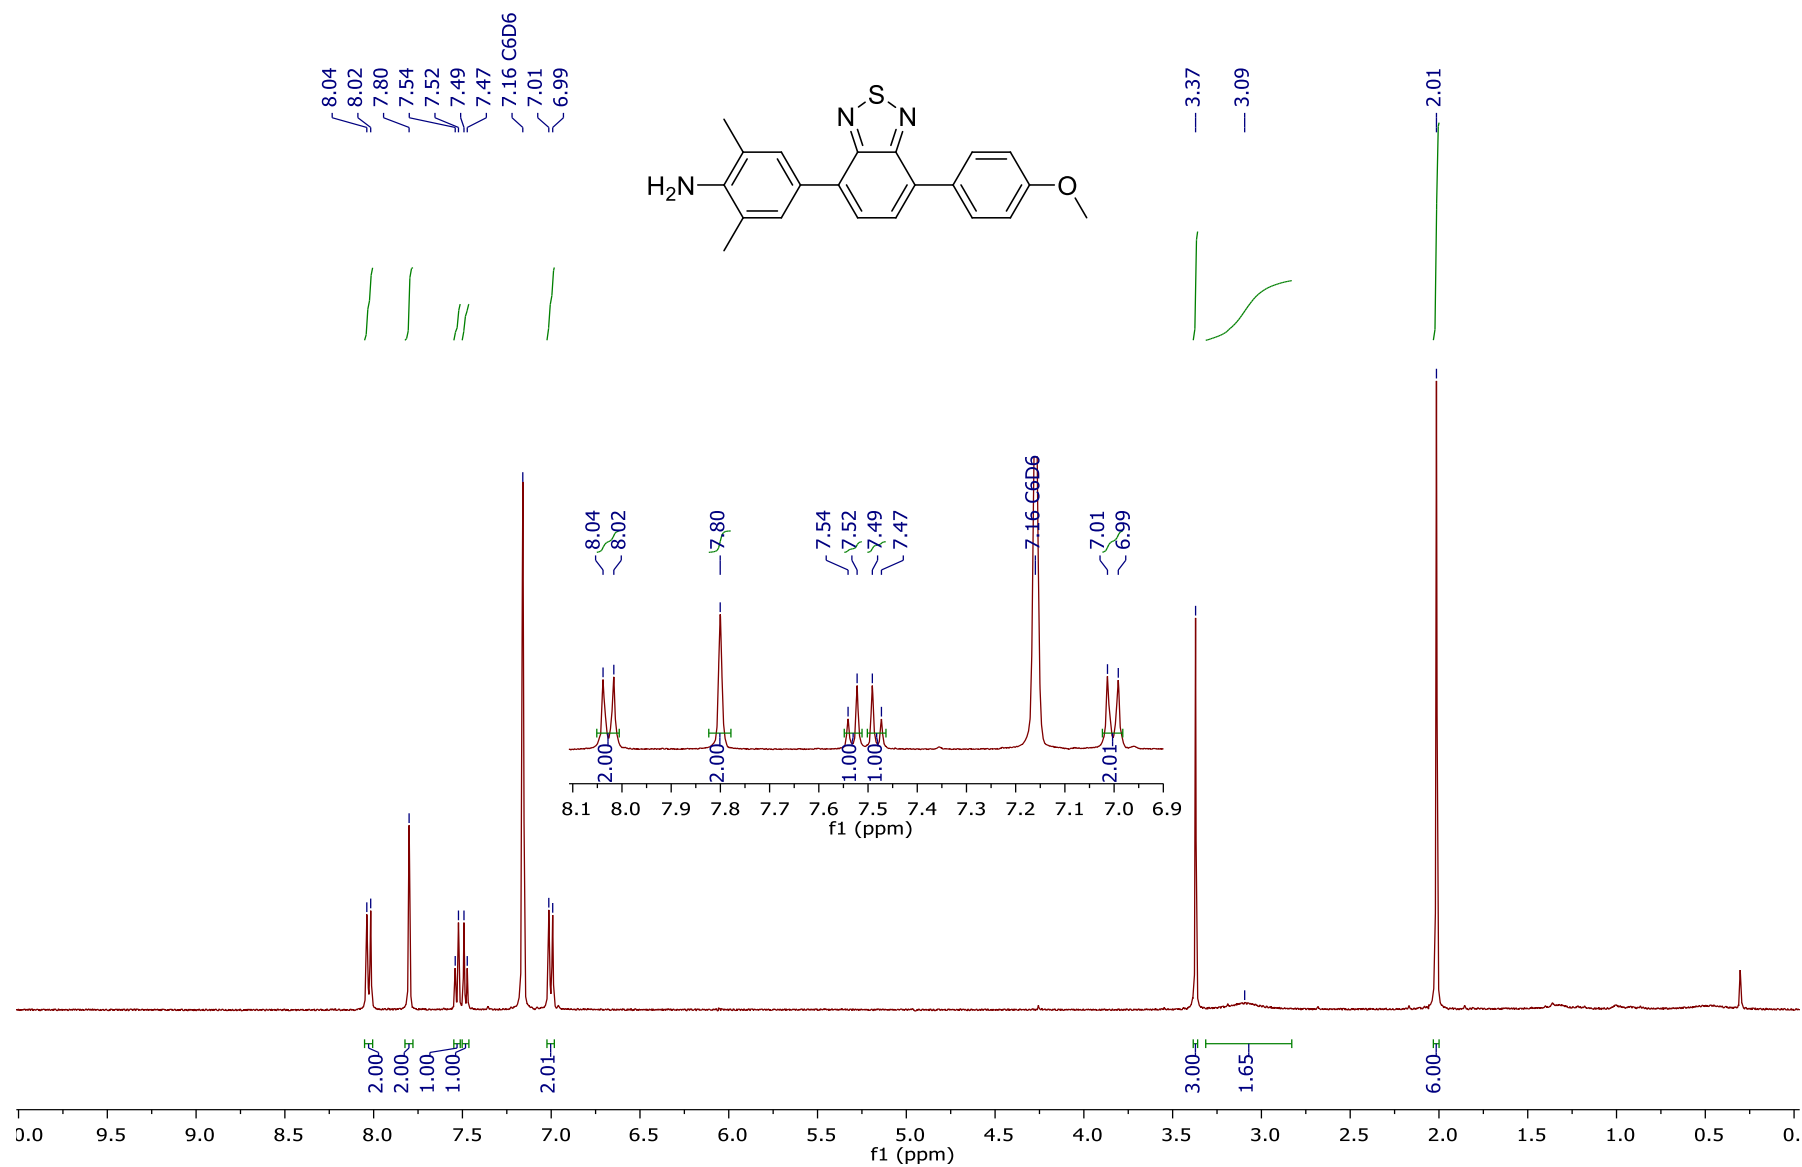

Figure S13. <sup>1</sup>H NMR (400 MHz, Benzene-*d*<sub>6</sub>) of 4-(7-(4-methoxyphenyl)benzo[c][1,2,5]thiadiazol-4-yl)-2,6-dimethylaniline (2)

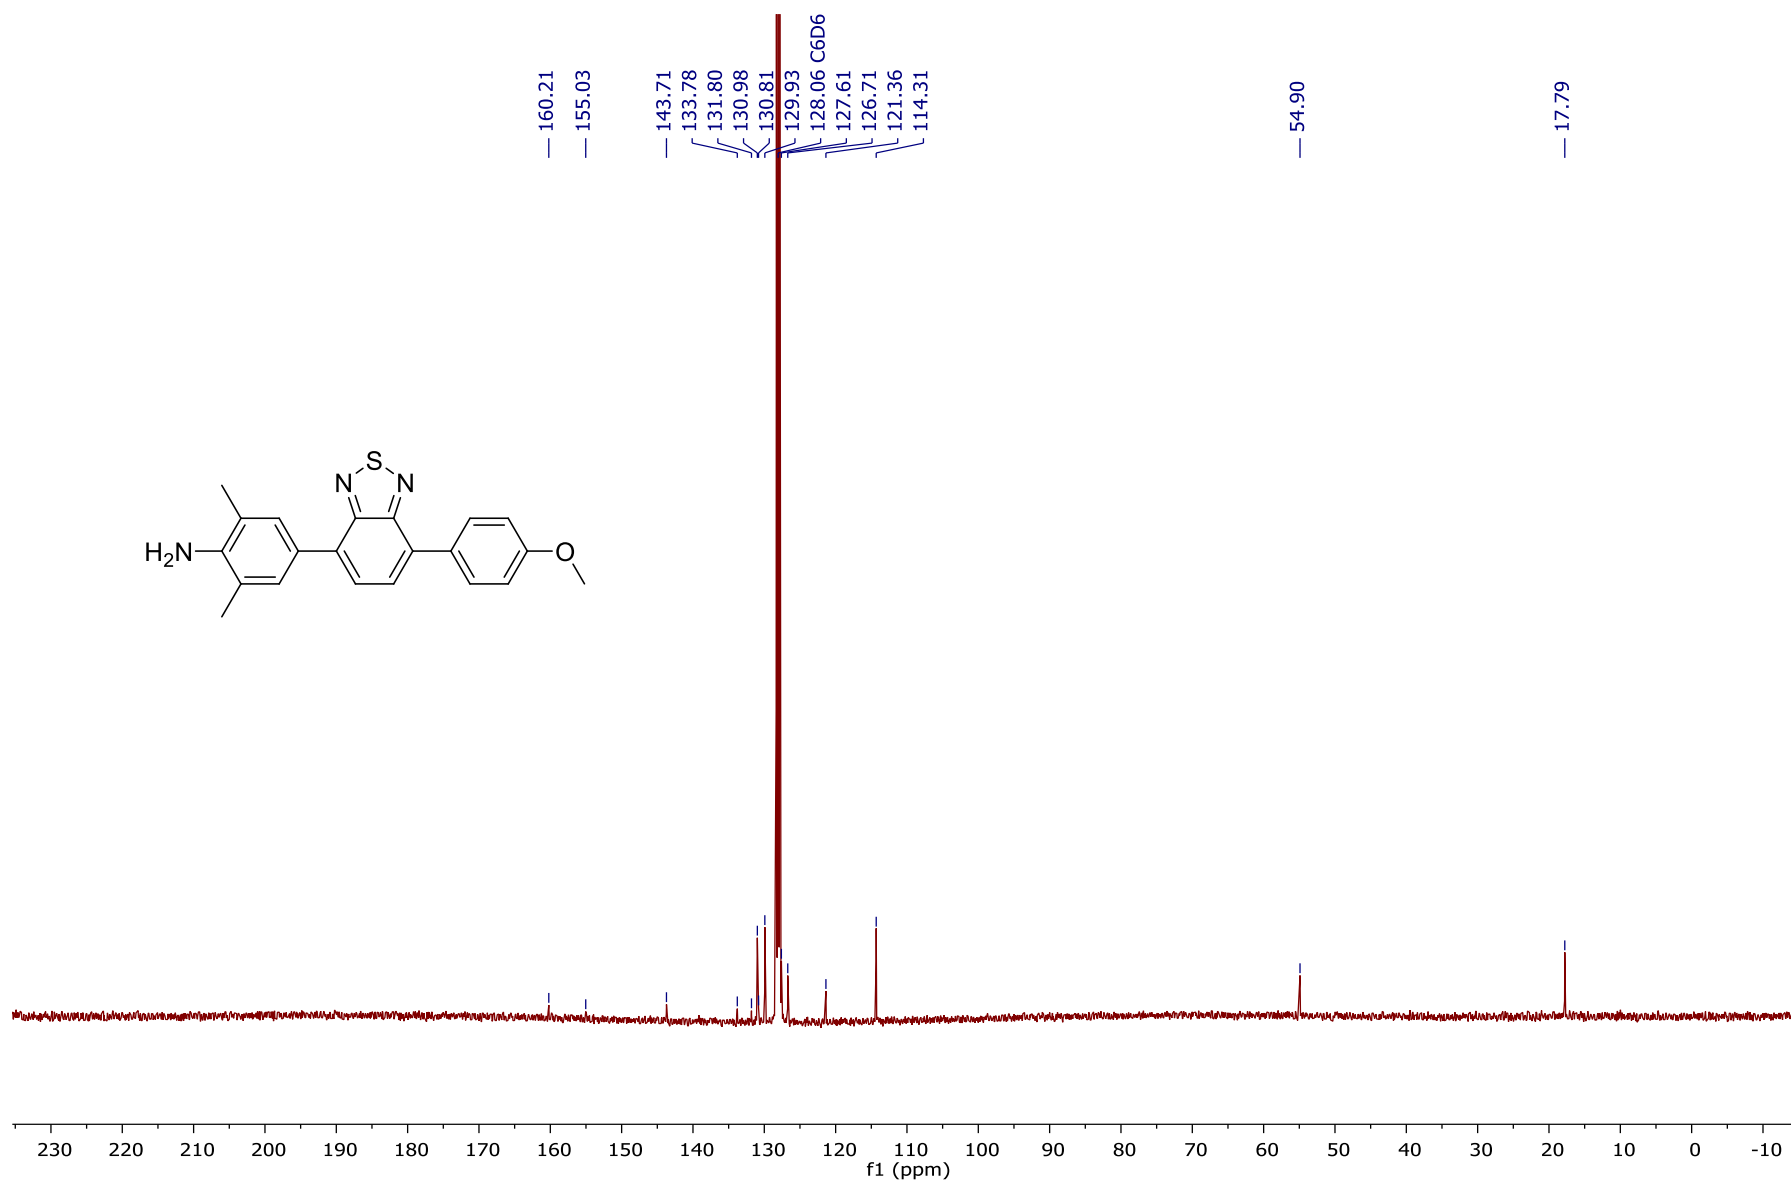

Figure S14. <sup>13</sup>C NMR (101 MHz, Benzene-*d*<sub>6</sub>) of 4-(7-(4-methoxyphenyl)benzo[c][1,2,5]thiadiazol-4-yl)-2,6-dimethylaniline (2)

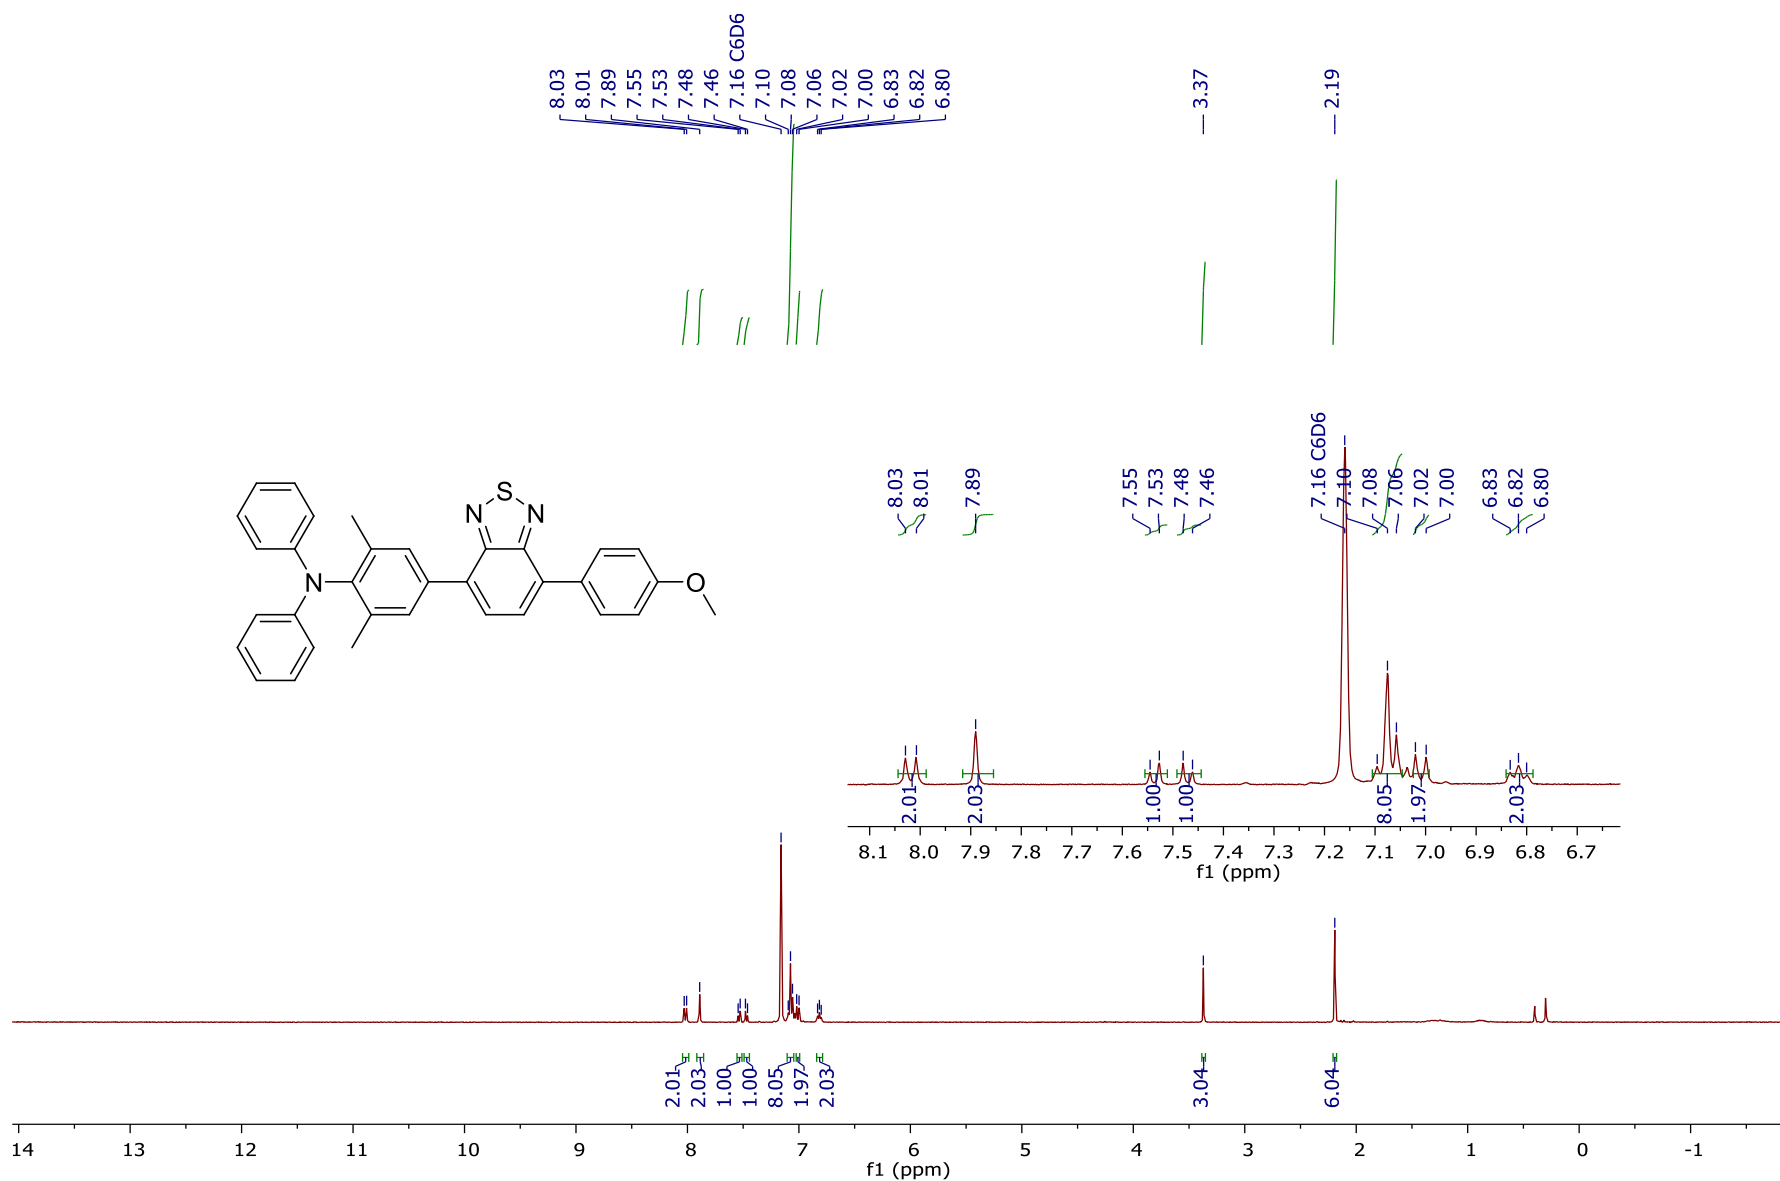

Figure S15. <sup>1</sup>H NMR (400 MHz, Benzene-*d*<sub>6</sub>) of 4-(7-(4-methoxyphenyl)benzo[c][1,2,5]thiadiazol-4-yl)-2,6-dimethyl-N,N-diphenylaniline (D1)

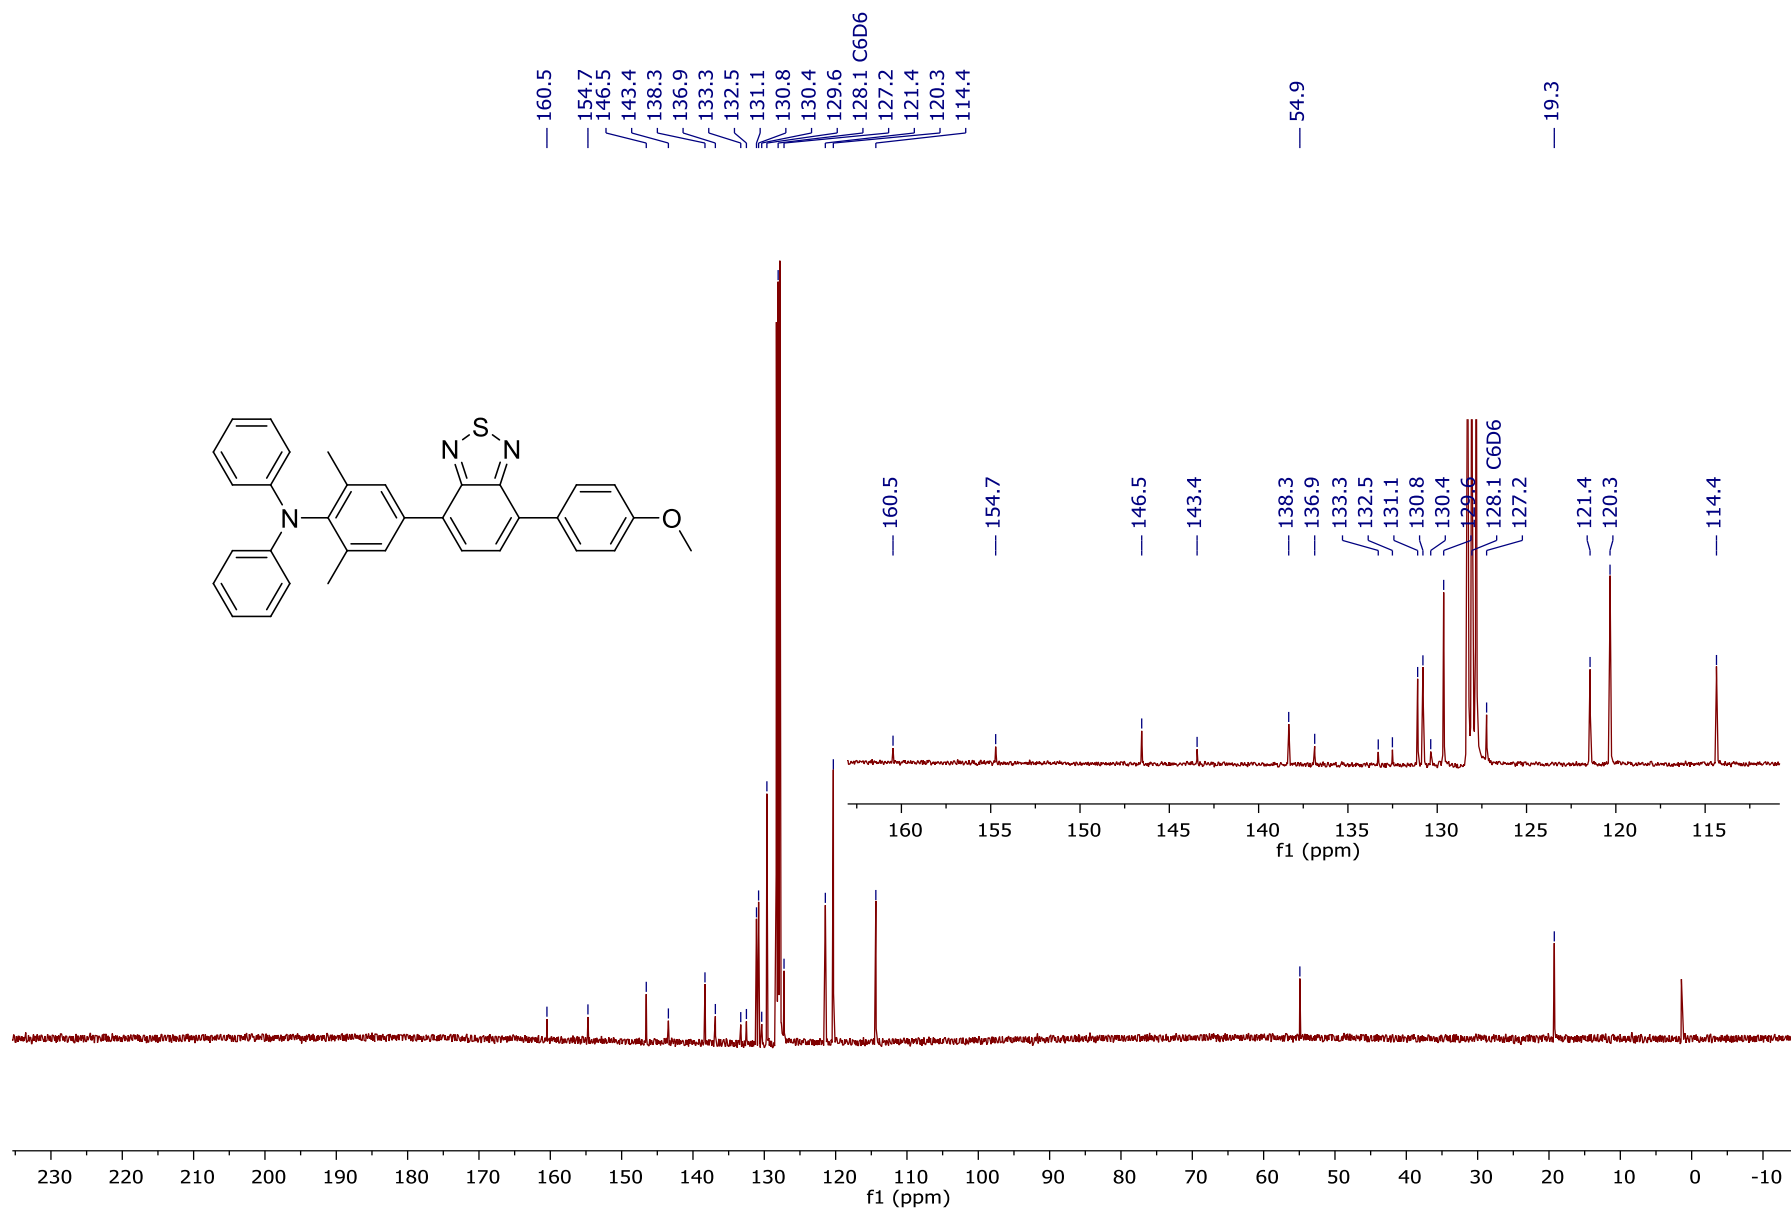

Figure S16. <sup>13</sup>C NMR (101 MHz, Benzene-*d*<sub>6</sub>) of 4-(7-(4-methoxyphenyl)benzo[c][1,2,5]thiadiazol-4-yl)-2,6-dimethyl-N,N-diphenylaniline (D1)

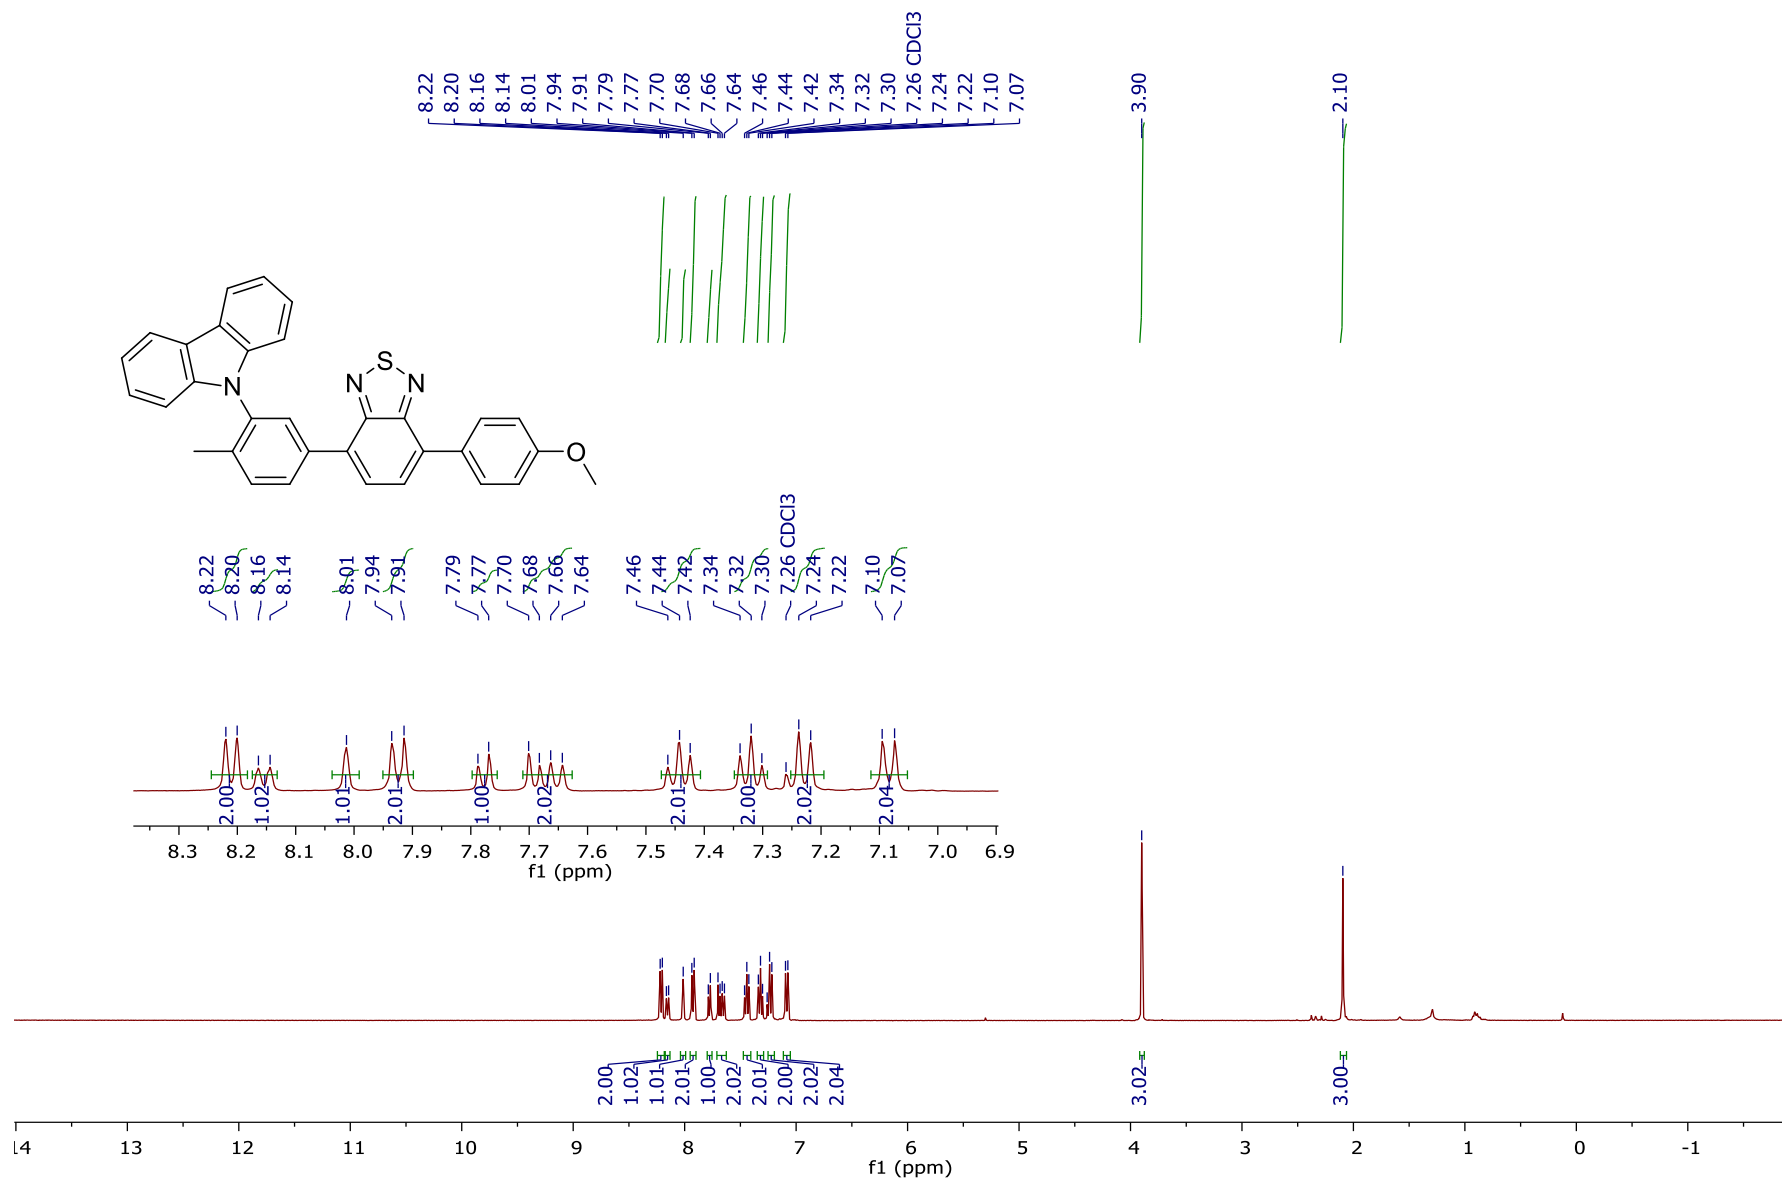

Figure S17. <sup>1</sup>H (400 MHz, Chloroform-*d*) of 4-(3-(9H-carbazol-9-yl)-4-methylphenyl)-7-(4-methoxyphenyl)benzo[c][1,2,5]thiadiazole (D2)

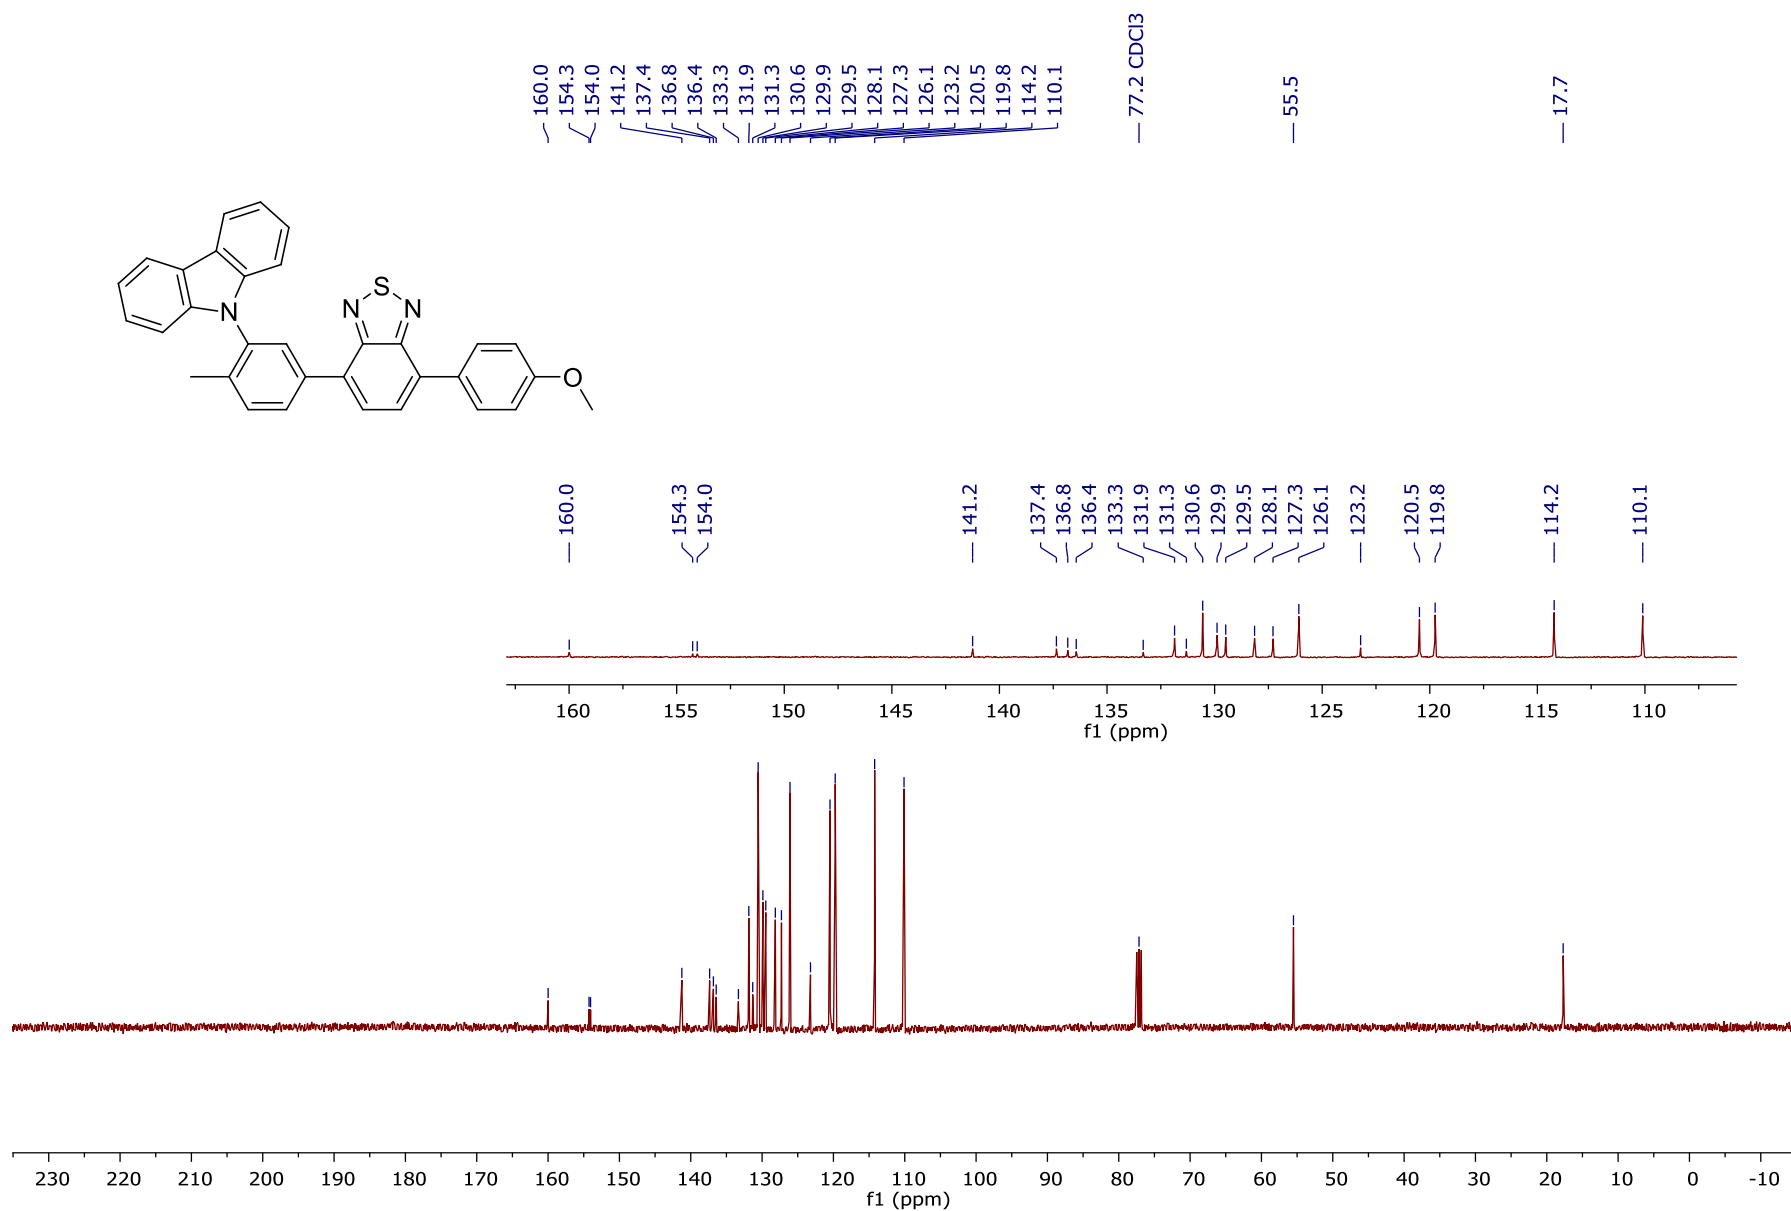

Figure S18.  $^{13}\text{C}\{^1\text{H}\}$  NMR of 4-(3-(9H-carbazol-9-yl)-4-methylphenyl)-7-(4-methoxyphenyl)benzo[c][1,2,5]thiadiazole (D2)

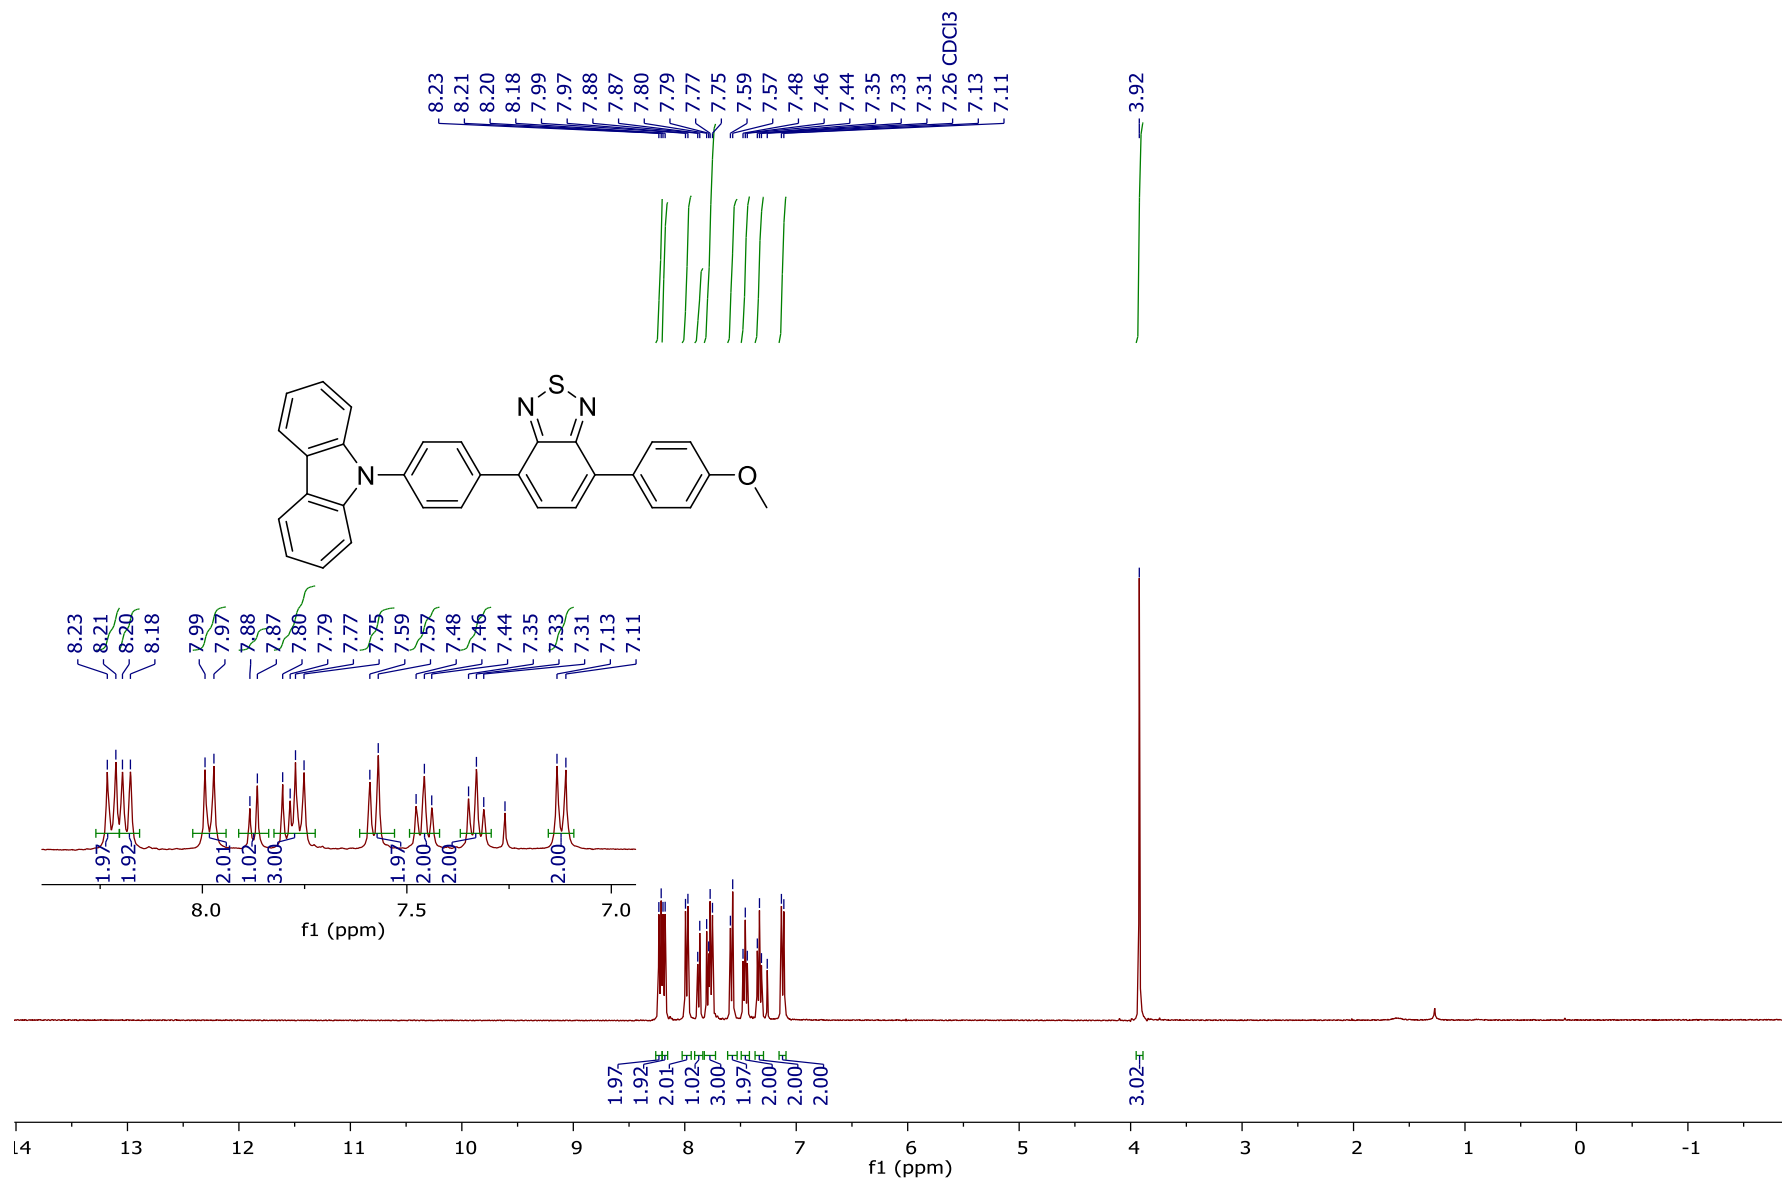

Figure S19. <sup>1</sup>H (400 MHz, Chloroform-d) of 4-(4-(9H-carbazol-9-yl)phenyl)-7-(4-methoxyphenyl)benzo[c][1,2,5]thiadiazole (D3)

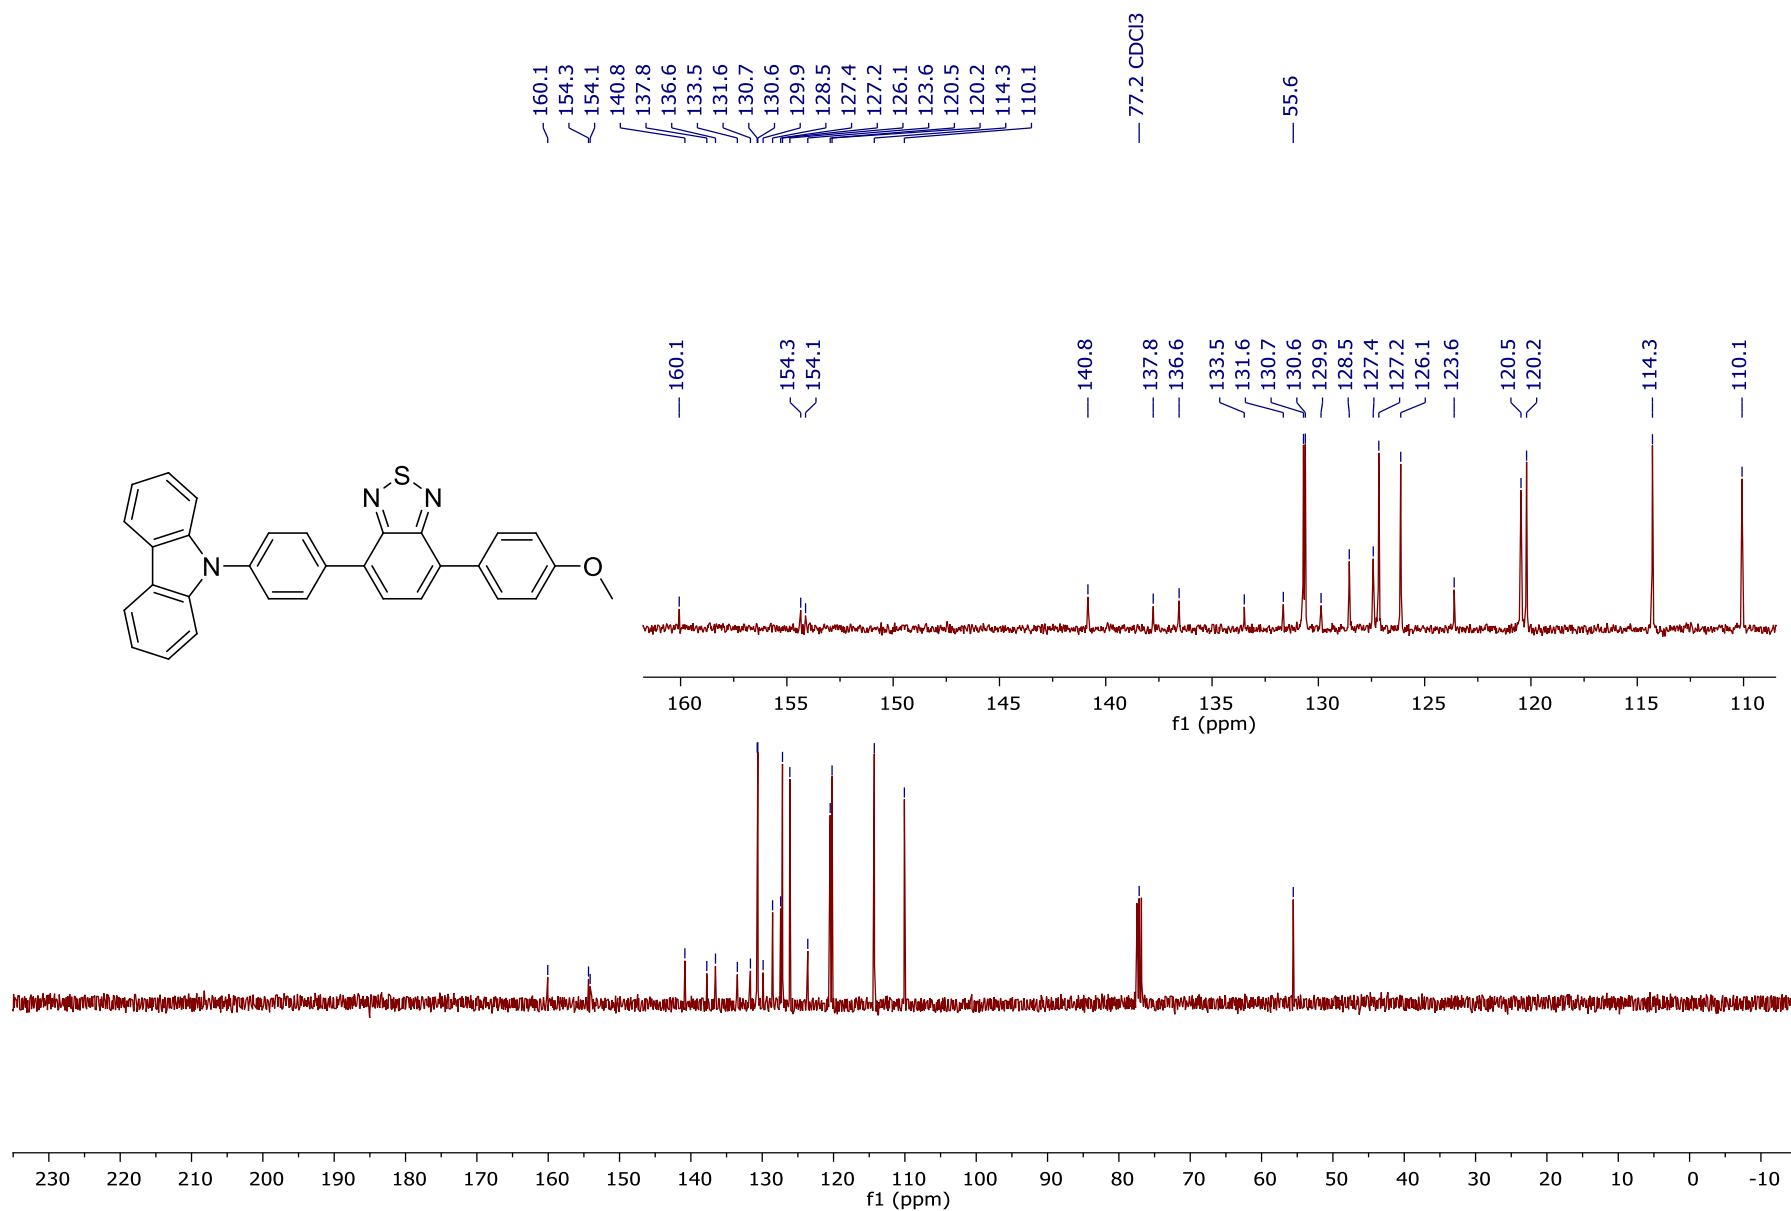

Figure S20.  $^{13}\text{C}\{^1\text{H}\}$  NMR of 4-(4-(9H-carbazol-9-yl)phenyl)-7-(4-methoxyphenyl)benzo[c][1,2,5]thiadiazole (D3)
